# Supplementary material
Source: ML conference proceedings conference paper supplement (https://proceedings.mlr.press/v80/barreto18a.html)
Supplement: Supplementary file 1 [file barreto18a-supp.zip]

Archive with 2 entries (2 files):
- sfs_gpi_appendix.pdf
- sfs_gpi_video.mp4
